# Supplementary material for: Ablation of gut microbiota alleviates obesity-induced hepatic steatosis and glucose intolerance by modulating bile acid metabolism in hamsters
Source: PubMed Central journal article supplement — Acta Pharm Sin B. 2019 Feb 16;9(4):702–10. doi: 10.1016/j.apsb.2019.02.004 (PMC6664038; doi:10.1016/j.apsb.2019.02.004), 2019-02-16
Supplement: mmc1.pdf [file mmc1.pdf]

**Supporting Information for**

**Original article**

**Ablation of gut microbiota alleviates obesity-induced hepatic steatosis and glucose intolerance by modulating bile acid metabolism in hamsters**

**Lulu Sun<sup>a,†</sup>, Yuanyuan Pang<sup>a,†</sup>, Xuemei Wang<sup>a</sup>, Qing Wu<sup>a</sup>, Huiying Liu<sup>a</sup>, Bo Liu<sup>a</sup>, George Liu<sup>b</sup>,  
Changtao Jiang<sup>a,\*</sup>**

*<sup>a</sup>Department of Physiology and Pathophysiology, School of Basic Medical Sciences, Peking University, and the Key Laboratory of Molecular Cardiovascular Science, Ministry of Education, Beijing 100191, China*

*<sup>b</sup>Institute of Cardiovascular Sciences and Key Laboratory of Molecular Cardiovascular Sciences, Ministry of Education, Peking University, Beijing 100191, China*

Received 12 December 2018; received in revised form 30 December 2018; accepted 18 January 2019

\*Corresponding author. [jiangchangtao@bjmu.edu.cn](mailto:jiangchangtao@bjmu.edu.cn) (Changtao Jiang).

<sup>†</sup>These authors made equal contributions to this work.

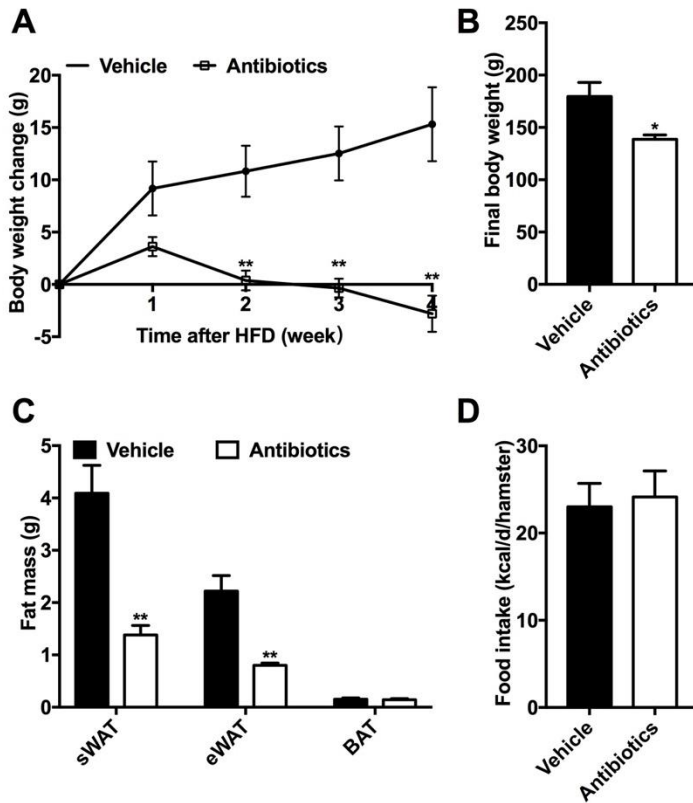

**Figure S1** Ablation of gut microbiota ameliorates HFD-induced metabolic disorders in hamsters. The hamsters were fed a 60% high-fat diet and given vehicle or antibiotics for 4 weeks. (A) Body weight change; (B) Final body weight; (C) Fat mass of subcutaneous white adipose tissue (sWAT), epididymal white adipose tissue (eWAT) and brown white adipose tissue (BAT); (D) Daily food intake. Data are presented as the mean±SEM,  $n=5$  hamsters/group. \* $P<0.05$ , \*\* $P<0.01$  versus vehicle by two-tailed Student's  $t$ -test.

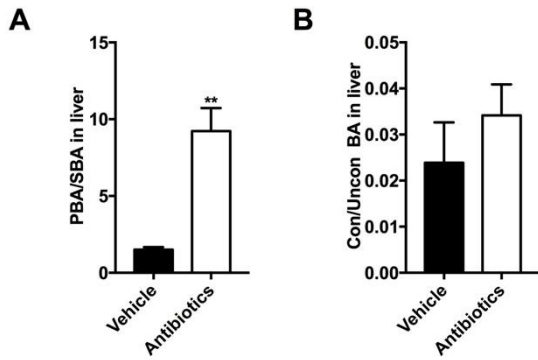

**Figure S2** Bile acid levels in the liver after antibiotic treatment. The hamsters were fed a 60% high-fat diet and given vehicle or antibiotics for 4 weeks. (A) The ratio of primary bile acids to secondary bile acids in the liver [PBA/SBA=(GCDCA+TCDCA+CDCA+CA+TCA+GCA+ $\beta$ MCA+T $\beta$ MCA)/(LCA+HDCA+UDCA+DCA+GDCA+GUDCA+TLCA+TUDCA+TDCA+THDCA)]. (B) The ratio of conjugated bile acids to unconjugated bile acids in the liver [ConBA/UnconBA=(GCDCA+GDCA+GUDCA+GCA+TLCA +TUDCA+TDCA+THDCA+TCA+T $\beta$ MCA)/(LCA+HDCA+CDCA+UDCA+DCA+CA+ $\beta$ MCA)]. Data are presented as the mean $\pm$ SEM,  $n=5$  hamsters/group. \* $P<0.05$ , \*\* $P<0.01$  versus vehicle by two-tailed Student's  $t$ -test.

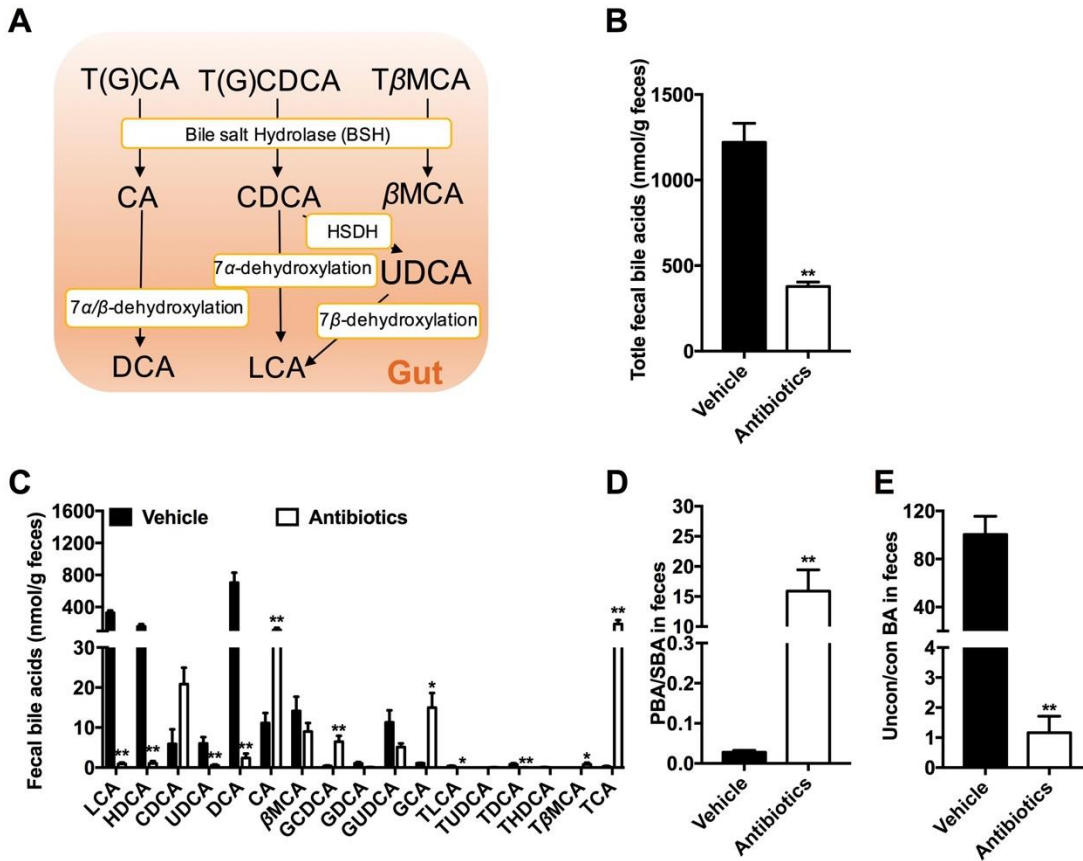

**Figure S3** Bile acid levels in the feces after antibiotic treatment. The hamsters were fed a 60% high-fat diet and given vehicle or antibiotics for 4 weeks. (A) Gut microbiota-mediated bile acid metabolism in the gut; (B) Total content of fecal bile acids; (C) Fecal bile acid levels; (D) The ratio of primary bile acids to secondary bile acids in the feces; (E) The ratio of unconjugated bile acids to conjugated bile acids in the feces. Data are presented as the mean $\pm$ SEM,  $n=5$  hamsters/group. \* $P<0.05$ , \*\* $P<0.01$  versus vehicle by two-tailed Student's  $t$ -test.

**Table S1** Sequences of the real-time PCR primers used in this study.

| Primers                       | Forward                  | Reverse               |
|-------------------------------|--------------------------|-----------------------|
| <i>Fxr</i>                    | TGCGACAGATTGGTTCTAGGT    | TTTCGGAGGGGTTAGACAGC  |
| <i>Shp</i>                    | AGGGAGGCCTTGGATGTC       | AGAAGGACGGCAGGTTCC    |
| <i>Fgf19</i>                  | ATTACTCGGCGGAAGACTGC     | TGGAGCCGTTGCCTGTATTT  |
| <i>Ntcp</i>                   | CTTACTCAGTGTGGCGGTCA     | GAGAGCAGAGAGAGCGTAGC  |
| <i>Bsep</i>                   | ATGCACTACGGCTGGATCTG     | CAGGTGATACAAGGGCAGGG  |
| <i>Abcc2</i>                  | GAGGCAGTACACCATCGGAG     | CAGAGCACTTGACCACACCA  |
| <i>Abcc3</i>                  | ACAGGCACCAGTGTGCATCAG    | TTGGAGGCGATGTAGGGGTA  |
| <i>Srebp1c</i>                | CTTTTCGGTAAGGCGGGC       | TGGAGCATGTCTTGATGTCCG |
| <i>Fasn</i>                   | GATTTCGGTGCCTGCTGGTAT    | CCCATCACGGTACACGTTCA  |
| <i>Scd1</i>                   | GGAGAAGCAGAAGACCGTTCC    | CCCCTCCTCATCTGGTAGC   |
| <i>Acaca</i>                  | TGATCTGCTGTCACCTTTCGC    | ATCCAGGAGTGGCTTGCCTT  |
| <i>Elovl6</i>                 | TCCTCGTTTGACTTCACGCA     | TACCCCAAATCAGGCAGAGC  |
| <i>Cd36</i>                   | GTCTCCTTCAACGGTCATCCT    | GAACTACCCACCAGTTGCTCC |
| <i>Cpt1</i>                   | TTGAGTAGTTGCCCAAGGTGC    | ACACACCCCTAAGGATGCCA  |
| <i>Acox1</i>                  | CGTCCGTCCCAAGAACTCC      | GGGTCGTATGTGGCTGTAGT  |
| <i>Ucp1</i>                   | GCCACCTACACGGGATCAAA     | GGTTAGGGGTCGTCCCTTTC  |
| <i>Elovl3</i>                 | TTCTTCCAGCAAGCCTACCTC    | TCTTGGTGGTCATAGCTCCCT |
| <i>Cox8b</i>                  | CTACGGTTTCTGGGCTGTGT     | ACAGGGTGCATGAGAAGCTC  |
| <i>Tmem26</i>                 | AACTGGTATGCCCTCCTCT      | ATCAGGACAAGGCGCACAAAT |
| <i>Prdm16</i>                 | TGCATCAAAAAGATCTCTGAAGAC | TCCAGGCTCAACGTCCCTAAT |
| <i>Pgc1a</i>                  | CACCTACTACACCGATGGGC     | ACTCCTGGTTGGGGACCTTA  |
| <i>Cidea</i>                  | CGATTTCGTGTCCTATGCTGC    | GGGAGACTGTTCTTCCGCAT  |
| <i>Cyp7a1</i>                 | ACTGCTAAGGAGGATTTCACTCT  | CTCATCCAGGATTTCACTCT  |
| <i>Cyp8b1</i>                 | GATGGCACCCGAAAGTGGA      | TAGTGGTGGATCTTCTTGCC  |
| <i>Cyp27a1</i>                | AGGAAGTGACCCAGTTTGTGTT   | GGTGTGAGACCCTGGAGTTT  |
| <i>Cyp7b1</i>                 | ATGGAAGGAGCCAAGACACC     | CCAGGATTAGTAGGGTGGCG  |
| <i>Il-6</i>                   | GGAGTGGCCAAGAACCAAGA     | ATGCTAAGGCACAGCACACT  |
| <i>Tnfa</i>                   | AGAATCCGGGCAGGTCTACT     | TATCCCGGCAGCTTGTGTTT  |
| <i>Il-1<math>\beta</math></i> | GCAGTTCCCCAACTGGTACA     | TAAATCCTGGCCGCTGTTGT  |
| 18S rRNA                      | TAAGTCCCTGCCCTTTGTACACA  | GATCCGAGGGCCTCACTAAAC |
